# Supplementary material for: Endogenous gut microbiome and implanted intranasal E. coli-Nissle modulate cancer tissues metabolism in 4T1 syngeneic tumor bearing mice
Source: Research Square preprint supplement (doi:10.21203/rs.3.rs-6990456/v1), 2025-07-08
Supplement: Supplementary file 1 [file 139c1c1ce80c7a1196a4d70d.docx]

Table 1: Statistical analysis by ANOVA of homogenate and tissue samples

| **Tissue Samples** | | | | | | **Homogenate Samples** | | | | |
| --- | --- | --- | --- | --- | --- | --- | --- | --- | --- | --- |
| **Metabolite** | **f-value** | **p-value** | **-log10(p)** | **FDR** | **Fisher's LSD** | **f-value** | **p-value** | **-log10(p)** | **FDR** | **Fisher's LSD** |
| t4.OH.Pro | 25.837 | 4.3062e-09 | 8.3659 | 8.2679e-07 | ABT-PBS - ABT-EcN PBS - ABT-EcN  ABT-PBS - EcN  PBS - EcN | 25.606 | 4.802e-09 | 8.3186 | 9.2679e-07 | ABT-PBS - ABT-EcN   PBS - ABT-EcN   ABT-PBS - EcN   PBS - EcN |
| C3.DC..C4.OH. | 20.064 | 8.1444e-08 | 7.0891 | 7.8186e-06 | ABT-PBS - ABT-EcN PBS - ABT-EcN  ABT-PBS - EcN  PBS - ABT-PBS  PBS - EcN | 20.09 | 8.0286e-08 | 7.0954 | 7.7476e-06 | ABT-PBS - ABT-EcN   PBS - ABT-EcN   ABT-PBS - EcN   PBS - ABT-PBS   PBS - EcN |
| C2 / C0 | 19.058 | 1.4325e-07 | 6.8439 | 9.1678e-06 | ABT-PBS - ABT-EcN ABT-EcN - EcN   PBS - ABT-EcN   ABT-PBS - EcN   PBS - EcN | 19.168 | 1.3455e-07 | 6.8711 | 8.6563e-06 | ABT-PBS - ABT-EcN   ABT-EcN - EcN   PBS - ABT-EcN   ABT-PBS - EcN   PBS - EcN |
| C2.C3 / C0 | 18.524 | 1.9476e-07 | 6.7105 | 9.3483e-06 | ABT-PBS - ABT-EcN ABT-EcN - EcN   PBS - ABT-EcN   ABT-PBS - EcN   PBS - EcN | 18.635 | 1.8263e-07 | 6.7384 | 8.8121e-06 | ABT-PBS - ABT-EcN   ABT-EcN - EcN   PBS - ABT-EcN   ABT-PBS - EcN   PBS - EcN |
| Kynurenine | 16.504 | 6.5351e-07 | 6.1848 | 2.5095e-05 | ABT-PBS - ABT-EcN ABT-EcN - EcN   PBS - ABT-EcN   ABT-PBS - EcN   PBS - EcN | 16.472 | 6.6694e-07 | 6.1759 | 2.5744e-05 | ABT-PBS - ABT-EcN   ABT-EcN - EcN   PBS - ABT-EcN   ABT-PBS - EcN   PBS - EcN |
| Cit / Orn | 15.223 | 1.4724e-06 | 5.832 | 4.7116e-05 | ABT-PBS - ABT-EcN PBS - ABT-EcN   ABT-PBS - EcN   PBS - EcN | 15.172 | 1.5211e-06 | 5.8178 | 4.893e-05 | ABT-PBS - ABT-EcN   PBS - ABT-EcN   ABT-PBS - EcN   PBS - EcN |
| Kynurenine / Trp | 14.283 | 2.7353e-06 | 5.563 | 7.5026e-05 | ABT-PBS - ABT-EcN ABT-EcN - EcN   ABT-PBS - EcN   PBS - EcN | 14.249 | 2.798e-06 | 5.5532 | 7.7144e-05 | ABT-PBS - ABT-EcN   ABT-EcN - EcN   ABT-PBS - EcN   PBS - EcN |
| **Tissue Samples** | | | | | | **Homogenate Samples** | | | | |
| **Metabolite** | **f-value** | **p-value** | **-log10(p)** | **FDR** | **Fisher's LSD** | **f-value** | **p-value** | **-log10(p)** | **FDR** | **Fisher's LSD** |
| Ala | 12.122 | 1.2364e-05 | 4.9078 | 0.00026377 | PBS - ABT-EcN   PBS - ABT-PBS   PBS - EcN | 12.008 | 1.3439e-05 | 4.8716 | 0.00028819 | PBS - ABT-EcN   PBS - ABT-PBS   PBS - EcN |
| PC.aa.C36.6 | 11.228 | 2.3991e-05 | 4.62 | 0.00046062 | ABT-EcN - ABT-PBS ABT-EcN - EcN   ABT-EcN - PBS   EcN - ABT-PBS   PBS - ABT-PBS | 11.128 | 2.5861e-05 | 4.5873 | 0.00049912 | ABT-EcN - ABT-PBS   ABT-EcN - EcN   ABT-EcN - PBS   EcN - ABT-PBS   PBS - ABT-PBS |
| lysoPC.a.C16.1 | 9.2034 | 0.00011802 | 3.9281 | 0.0020599 | ABT-EcN - ABT-PBS ABT-EcN - PBS   EcN - ABT-PBS   EcN - PBS | 9.2315 | 0.00011533 | 3.9381 | 0.0020234 | ABT-EcN - ABT-PBS   ABT-EcN - PBS   EcN - ABT-PBS   EcN - PBS |
| C6..C4.1.DC. | 8.3524 | 0.00024063 | 3.6186 | 0.003582 | ABT-PBS - ABT-EcN PBS - ABT-EcN   ABT-PBS - EcN   PBS - EcN | 8.3848 | 0.00023408 | 3.6306 | 0.0035777 | ABT-PBS - ABT-EcN   PBS - ABT-EcN   ABT-PBS - EcN   PBS - EcN |
| C18.2 | 8.3432 | 0.00024253 | 3.6152 | 0.003582 | ABT-PBS - ABT-EcN PBS - ABT-EcN   ABT-PBS - EcN   PBS - EcN | 8.3507 | 0.00024098 | 3.618 | 0.0035777 | ABT-PBS - ABT-EcN   PBS - ABT-EcN   ABT-PBS - EcN   PBS - EcN |
| Thr | 8.0851 | 0.00030269 | 3.519 | 0.0041512 | PBS - ABT-EcN   PBS - ABT-PBS   PBS - EcN | 8.0802 | 0.00030397 | 3.5172 | 0.0041904 | PBS - ABT-EcN   PBS - ABT-PBS   PBS - EcN |
| PC.ae.C32.1 | 7.8294 | 0.00037798 | 3.4225 | 0.0048381 | ABT-EcN - ABT-PBS ABT-EcN - PBS   EcN - PBS | 7.8591 | 0.00036829 | 3.4338 | 0.0047386 | ABT-EcN - ABT-PBS   ABT-EcN - PBS   EcN - PBS |
| PC.ae.C30.0 | 7.5018 | 0.00050434 | 3.2973 | 0.0060521 | ABT-EcN - ABT-PBS ABT-EcN - PBS   EcN - PBS | 7.4901 | 0.00050961 | 3.2928 | 0.0061472 | ABT-EcN - ABT-PBS   ABT-EcN - PBS   EcN - PBS |
| C5 | 6.8319 | 0.00092227 | 3.0351 | 0.010097 | ABT-EcN - ABT-PBS EcN - ABT-PBS   PBS - ABT-PBS   EcN - PBS | 6.8278 | 0.00092573 | 3.0335 | 0.01051 | ABT-EcN - ABT-PBS   EcN - ABT-PBS   PBS - ABT-PBS   EcN - PBS |
| **Tissue Samples** | | | | | | **Homogenate Samples** | | | | |
| **Metabolite** | **f-value** | **p-value** | **-log10(p)** | **FDR** | **Fisher's LSD** | **f-value** | **p-value** | **-log10(p)** | **FDR** | **Fisher's LSD** |
| Met | 6.5976 | 0.0011441 | 2.9415 | 0.011561 | ABT-EcN - ABT-PBS ABT-EcN - EcN   ABT-EcN - PBS | 6.5737 | 0.0011697 | 2.9319 | 0.011882 | ABT-EcN - ABT-PBS   ABT-EcN - EcN   ABT-EcN - PBS |
| SM.C24.0 | 6.3324 | 0.0014647 | 2.8343 | 0.014061 | ABT-EcN - ABT-PBS ABT-EcN - EcN   ABT-EcN - PBS | 6.3218 | 0.0014792 | 2.83 | 0.014275 | ABT-EcN - ABT-PBS   ABT-EcN - PBS |
| PC.ae.C32.2 | 6.1988 | 0.0016606 | 2.7797 | 0.015183 | ABT-EcN - ABT-PBS ABT-EcN - PBS   EcN - ABT-PBS   EcN - PBS | 6.2368 | 0.0016022 | 2.7953 | 0.014725 | ABT-EcN - ABT-PBS   ABT-EcN - PBS   EcN - ABT-PBS   EcN - PBS |
| Met.SO | 5.5299 | 0.0031528 | 2.5013 | 0.027516 | ABT-EcN - ABT-PBS ABT-EcN - PBS   EcN - ABT-PBS   EcN - PBS | 5.5568 | 0.0030712 | 2.5127 | 0.026943 | ABT-EcN - ABT-PBS   ABT-EcN - PBS   EcN - ABT-PBS   EcN - PBS |
| Gly | 5.3537 | 0.0037454 | 2.4265 | 0.031266 | ABT-PBS - EcN   PBS - EcN | 5.2924 | 0.0039782 | 2.4003 | 0.032747 | ABT-PBS - EcN   PBS - EcN |
| Putrescine / Orn | 5.2862 | 0.0040027 | 2.3977 | 0.032021 | ABT-PBS - ABT-EcN PBS - ABT-EcN   ABT-PBS - EcN   PBS - EcN | 5.2687 | 0.0040722 | 2.3902 | 0.032747 | ABT-PBS - ABT-EcN   PBS - ABT-EcN   ABT-PBS - EcN   PBS - EcN |
| FischerRatio | 5.0774 | 0.0049222 | 2.3078 | 0.037803 | ABT-EcN - EcN   ABT-EcN - PBS   ABT-PBS - PBS | 5.1111 | 0.0047599 | 2.3224 | 0.036747 | ABT-EcN - EcN   ABT-EcN - PBS   ABT-PBS - PBS |
| PC.aa.C40.2 | 4.8547 | 0.0061511 | 2.211 | 0.045424 | ABT-EcN - ABT-PBS ABT-EcN - EcN   ABT-EcN - PBS | 4.8587 | 0.006126 | 2.2128 | 0.045474 | ABT-EcN - ABT-PBS   ABT-EcN - EcN   ABT-EcN - PBS |
| Spermidine / Putrescine | 4.7379 | 0.0069202 | 2.1599 | 0.04921 | ABT-EcN - PBS   EcN - PBS | 4.7612 | 0.0067589 | 2.1701 | 0.048313 | ABT-EcN - PBS   EcN - PBS |

Table 2: Enrichment analysis homogenate Samples, EcN vs PBS

| **Homogenate_Samples_input_no_ABT** | **total** | **expected** | **hits** | **Raw p** | **Holm p** | **FDR** |
| --- | --- | --- | --- | --- | --- | --- |
| Spermidine and Spermine Biosynthesis | 18 | 0.141 | 4 | 4.5e-06 | 0.000441 | 0.000441 |
| Methionine Metabolism | 43 | 0.336 | 4 | 0.000168 | 0.0163 | 0.00821 |
| Glycine and Serine Metabolism | 59 | 0.461 | 3 | 0.00828 | 0.795 | 0.27 |
| Arginine and Proline Metabolism | 53 | 0.414 | 2 | 0.0602 | 1 | 1 |
| D-Arginine and D-Ornithine Metabolism | 11 | 0.0859 | 1 | 0.083 | 1 | 1 |
| Alanine Metabolism | 17 | 0.133 | 1 | 0.126 | 1 | 1 |
| Glutathione Metabolism | 21 | 0.164 | 1 | 0.153 | 1 | 1 |
| Betaine Metabolism | 21 | 0.164 | 1 | 0.153 | 1 | 1 |
| Carnitine Synthesis | 22 | 0.172 | 1 | 0.16 | 1 | 1 |
| Oxidation of Branched Chain Fatty Acids | 26 | 0.203 | 1 | 0.187 | 1 | 1 |
| Urea Cycle | 29 | 0.227 | 1 | 0.206 | 1 | 1 |
| Ammonia Recycling | 32 | 0.25 | 1 | 0.225 | 1 | 1 |
| Porphyrin Metabolism | 40 | 0.312 | 1 | 0.274 | 1 | 1 |
| Glutamate Metabolism | 49 | 0.383 | 1 | 0.325 | 1 | 1 |
| Tryptophan Metabolism | 60 | 0.469 | 1 | 0.384 | 1 | 1 |
| Bile Acid Biosynthesis | 65 | 0.508 | 1 | 0.409 | 1 | 1 |
| Purine Metabolism | 74 | 0.578 | 1 | 0.452 | 1 | 1 |

Table 3: Enrichment analysis tissue samples, EcN vs PBS

| **Tissue_Samples_input_no_ABT** | **total** | **expected** | **hits** | **Raw p** | **Holm p** | **FDR** |
| --- | --- | --- | --- | --- | --- | --- |
| Oxidation of Branched Chain Fatty Acids | 26 | 0.305 | 3 | 0.00275 | 0.27 | 0.186 |
| Urea Cycle | 29 | 0.34 | 3 | 0.00379 | 0.368 | 0.186 |
| Beta Oxidation of Very Long Chain Fatty Acids | 17 | 0.199 | 2 | 0.0155 | 1 | 0.507 |
| Arginine and Proline Metabolism | 53 | 0.621 | 3 | 0.0207 | 1 | 0.507 |
| Tryptophan Metabolism | 60 | 0.703 | 3 | 0.0288 | 1 | 0.565 |
| Beta-Alanine Metabolism | 34 | 0.398 | 2 | 0.0574 | 1 | 0.846 |
| Aspartate Metabolism | 35 | 0.41 | 2 | 0.0604 | 1 | 0.846 |
| Histidine Metabolism | 43 | 0.504 | 2 | 0.0871 | 1 | 1 |
| D-Arginine and D-Ornithine Metabolism | 11 | 0.129 | 1 | 0.122 | 1 | 1 |
| Glucose-Alanine Cycle | 13 | 0.152 | 1 | 0.143 | 1 | 1 |
| Glycine and Serine Metabolism | 59 | 0.691 | 2 | 0.149 | 1 | 1 |
| Alanine Metabolism | 17 | 0.199 | 1 | 0.183 | 1 | 1 |
| Spermidine and Spermine Biosynthesis | 18 | 0.211 | 1 | 0.193 | 1 | 1 |
| Glutathione Metabolism | 21 | 0.246 | 1 | 0.221 | 1 | 1 |
| Carnitine Synthesis | 22 | 0.258 | 1 | 0.231 | 1 | 1 |
| Mitochondrial Beta-Oxidation of Short Chain Saturated Fatty Acids | 27 | 0.316 | 1 | 0.276 | 1 | 1 |
| Selenoamino Acid Metabolism | 28 | 0.328 | 1 | 0.284 | 1 | 1 |
| Mitochondrial Beta-Oxidation of Long Chain Saturated Fatty Acids | 28 | 0.328 | 1 | 0.284 | 1 | 1 |
| Propanoate Metabolism | 42 | 0.492 | 1 | 0.397 | 1 | 1 |
| Fatty acid Metabolism | 43 | 0.504 | 1 | 0.404 | 1 | 1 |
| Glutamate Metabolism | 49 | 0.574 | 1 | 0.447 | 1 | 1 |
| Pyrimidine Metabolism | 59 | 0.691 | 1 | 0.511 | 1 | 1 |

Table 4: Enrichment analysis homogenate Samples, ABT-EcN vs ABT-PBS

| **Homogenate_Samples_input_ABT** | **total** | **expected** | **hits** | **Raw p** | **Holm p** | **FDR** |
| --- | --- | --- | --- | --- | --- | --- |
| Spermidine and Spermine Biosynthesis | 18 | 0.193 | 3 | 0.000691 | 0.0677 | 0.0677 |
| Valine, Leucine and Isoleucine Degradation | 60 | 0.645 | 3 | 0.0225 | 1 | 1 |
| Phenylalanine and Tyrosine Metabolism | 28 | 0.301 | 2 | 0.0341 | 1 | 1 |
| Methionine Metabolism | 43 | 0.462 | 2 | 0.0745 | 1 | 1 |
| D-Arginine and D-Ornithine Metabolism | 11 | 0.118 | 1 | 0.113 | 1 | 1 |
| Glycine and Serine Metabolism | 59 | 0.634 | 2 | 0.129 | 1 | 1 |
| Thyroid hormone synthesis | 13 | 0.14 | 1 | 0.132 | 1 | 1 |
| Catecholamine Biosynthesis | 20 | 0.215 | 1 | 0.196 | 1 | 1 |
| Betaine Metabolism | 21 | 0.226 | 1 | 0.205 | 1 | 1 |
| Oxidation of Branched Chain Fatty Acids | 26 | 0.279 | 1 | 0.247 | 1 | 1 |
| Urea Cycle | 29 | 0.312 | 1 | 0.272 | 1 | 1 |
| Propanoate Metabolism | 42 | 0.451 | 1 | 0.371 | 1 | 1 |
| Arginine and Proline Metabolism | 53 | 0.569 | 1 | 0.444 | 1 | 1 |
| Tryptophan Metabolism | 60 | 0.645 | 1 | 0.487 | 1 | 1 |
| Tyrosine Metabolism | 72 | 0.773 | 1 | 0.553 | 1 | 1 |

Table 5: Enrichment analysis tissue Samples, ABT-EcN vs ABT-PBS

| **Tissue_Samples_input_ABT** | **total** | **expected** | **hits** | **Raw p** | **Holm p** | **FDR** |
| --- | --- | --- | --- | --- | --- | --- |
| Oxidation of Branched Chain Fatty Acids | 26 | 0.254 | 3 | 0.00155 | 0.152 | 0.152 |
| Beta Oxidation of Very Long Chain Fatty Acids | 17 | 0.166 | 2 | 0.0108 | 1 | 0.397 |
| Arginine and Proline Metabolism | 53 | 0.518 | 3 | 0.0121 | 1 | 0.397 |
| Urea Cycle | 29 | 0.283 | 2 | 0.0303 | 1 | 0.742 |
| D-Arginine and D-Ornithine Metabolism | 11 | 0.107 | 1 | 0.103 | 1 | 1 |
| Tryptophan Metabolism | 60 | 0.586 | 2 | 0.112 | 1 | 1 |
| Spermidine and Spermine Biosynthesis | 18 | 0.176 | 1 | 0.163 | 1 | 1 |
| Carnitine Synthesis | 22 | 0.215 | 1 | 0.196 | 1 | 1 |
| Mitochondrial Beta-Oxidation of Short Chain Saturated Fatty Acids | 27 | 0.264 | 1 | 0.235 | 1 | 1 |
| Mitochondrial Beta-Oxidation of Long Chain Saturated Fatty Acids | 28 | 0.273 | 1 | 0.243 | 1 | 1 |
| Beta-Alanine Metabolism | 34 | 0.332 | 1 | 0.288 | 1 | 1 |
| Aspartate Metabolism | 35 | 0.342 | 1 | 0.295 | 1 | 1 |
| Histidine Metabolism | 43 | 0.42 | 1 | 0.35 | 1 | 1 |
| Fatty acid Metabolism | 43 | 0.42 | 1 | 0.35 | 1 | 1 |
| Glycine and Serine Metabolism | 59 | 0.576 | 1 | 0.449 | 1 | 1 |

Table 6: Results of the volcano plot of EcN vs PBS treatment of cancer cells with apparent status of “down” for Carnosine, Kyneurine and the ratios of Putrescine divided by Ornithine and Kyneurine divided by Tryptophan.

| **Homogenate Samples** | | | | | **Tissue Samples** | | | |
| --- | --- | --- | --- | --- | --- | --- | --- | --- |
| Metabolites | FC | log2(FC) | raw.pval | -log10(p) | FC | log2(FC) | raw.pval | -log10(p) |
| Kynurenine | 0.46368 | -1.1088 | 8.1239e-05 | 4.0902 | 0.46367 | -1.1088 | 8.0977e-05 | 4.0916 |
| Putrescine_div_by_Orn | 0.46864 | -1.0934 | 0.00013869 | 3.858 | 0.46854 | -1.0937 | 0.00013588 | 3.8669 |
| Kynurenine_div_by_Trp | 0.44349 | -1.173 | 0.00017314 | 3.7616 | 0.4435 | -1.173 | 0.00017285 | 3.7623 |
| Carnosine | 0.373 | -1.4227 | 0.016245 | 1.7893 | 0.37268 | -1.424 | 0.016227 | 1.7898 |

Table 7: Results of the volcano plot of a combination of antibiotic and EcN vs a combination of antibiotic and PBS treatment of cancer cells with apparent status of “down” for Carnosine and sugars (H1) and “up” for ratios of ADMA divided by Arginine and Ornithine divided by Arginine. In order to achieve the “up” status for the ratios, the Arginine concentrations have to be very low as a result of the treatments.

| **Homogenate Samples** | | | | | **Tissue Samples** | | | |
| --- | --- | --- | --- | --- | --- | --- | --- | --- |
| Metabolites | FC | log2(FC) | raw.pval | -log10(p) | FC | log2(FC) | raw.pval | -log10(p) |
| Carnosine | 0.10358 | -3.2712 | 9.5512e-07 | 6.0199 | 0.10359 | -3.271 | 9.5189e-07 | 6.0214 |
| H1 | 0.41377 | -1.2731 | 0.00052563 | 3.2793 | 0.41383 | -1.2729 | 0.0005261 | 3.2789 |
| ADMA_div_by_Arg | 2.0637 | 1.0452 | 0.037731 | 1.4233 | 2.0672 | 1.0477 | 0.037906 | 1.4213 |
| Orn_div_by_Arg | 2.2625 | 1.1779 | 0.058536 | 1.2326 | 2.2663 | 1.1803 | 0.058719 | 1.2312 |
